# Supplementary material for: Unexpected expansion of the voltage-gated proton channel family
Source: PubMed Central journal article supplement — FEBS J. Author manuscript; Available in PMC 2024 Mar 4. (PMC10911540; doi:10.1111/febs.16617), 2022-09-20

Figure Legends:

Fig. S1:

**Preliminary gene structure of *Aplysia* H<sub>v</sub> channel genes.** CDS: coding region, exon borders are indicated.

**AcH<sub>v</sub>1 scaffold00253**

|        |           |                |
|--------|-----------|----------------|
| CDS    | 195..1040 |                |
| Exon 1 | 1..194    | 517424..517617 |
| Exon 2 | 193..356  | 524625..524790 |
| Exon 3 | 356..464  | 528150..528258 |
| Exon 4 | 463..700  | 528668..528904 |
| Exon 5 | 696..1440 | 530671..531415 |

**AcH<sub>v</sub>2 scaffold00057**

|         |            |                |
|---------|------------|----------------|
| CDS     | 449..1468  |                |
| Exon 1  | 1..272     | 702415..702144 |
| Exon 2  | 273..633   | 697725..697365 |
| Exon 3  | 631..755   | 632843..632719 |
| Exon 4  | 756..897   | 625404..625263 |
| Exon 5  | 895..1029  | 623446..623312 |
| Exon 6  | 1026..1084 | 622455..622397 |
| Exon 7  | 1080..1221 | 617783..617642 |
| Exon 8  | 1220..1336 | 613702..613586 |
| Exon 9  | 1335..1423 | 612130..612042 |
| Exon 10 | 1422..2591 | 610782..609613 |

**AcH<sub>v</sub>3 scaffold00078**

|         |             |                |
|---------|-------------|----------------|
| CDS     | 3328..6270  |                |
| Exon 1  | 1..120      | 439851..439970 |
| Exon 2  | 120..473    | 458948..459301 |
| Exon 3  | 474..3394   | 460584..463504 |
| Exon 4  | 3390..3517  | 522792..522919 |
| Exon 5  | 3518..4451  | 550319..551252 |
| Exon 6  | 4450..4505  | 582759..582814 |
| Exon 7  | 4502..4644  | 589380..589522 |
| Exon 8  | 4643..4759  | 592841..592957 |
| Exon 9  | 4759..4833  | 595045..595120 |
| Exon 10 | 4830..10253 | 598366..603788 |

Fig. S2:

*Aplysia* EST expression analysis

|                         | juvenile CNS                     | Pedal-Pleural Ganglia        | homologous channels in other molluscs                                                                       |
|-------------------------|----------------------------------|------------------------------|-------------------------------------------------------------------------------------------------------------|
| <b>AcH<sub>v1</sub></b> | SAMN00150086                     | SAMN00150073<br>SAMN00150074 | hemocyte ( <i>Crassostrea gigas</i> )<br>larvae ( <i>Lottia gigantea</i> )<br>CNS ( <i>Melibe leonina</i> ) |
| <b>AcH<sub>v2</sub></b> | EB327294<br>EB299171             | EB210826                     | hemocyte ( <i>Crassostrea gigas</i> )<br>larvae ( <i>Lottia gigantea</i> )                                  |
| <b>AcH<sub>v3</sub></b> | EB295811<br>EB313783<br>EB337456 |                              | CNS ( <i>Tritonia diomedea</i> )<br>larvae ( <i>Lottia gigantea</i> )                                       |

Fig. S3

Sequence alignments of the three *Aplysia californica* channels

N-terminal domain  
(no significant homology)

S1 domain

```

AcHv1  VIHSQKFMVFIIIVLVVLCCLMVIAELLFDLEIVKL
AcHv2  FLKTNLVQYSTIIALVILCLIIVMELLIDMNIIV
AcHv3  LLHSKYVVILVILVTTCALVIAELLIDLSSVKK
..... : * * : * * : : * * : :

```

S1-S2 linker  
(no significant homology)

S2-S4 domains & linkers

```

AcHv1  HHYIPKIFHYGSLGILSLFLIEIGLRIFVLRDLDFFRKHKLELFDVAVVIVSFILDIVFRD---NEDAATGVGLLIILLLMVTIVNGIVLSVQKQAEK
AcHv2  REKAHVLRHALSLTILSIFMVEVCVKIYVEGKHLKQKAEVFDIIVVIVSFTLDITFSFVSVSKAASEAAGLMVILLLMVTIINGVIMSVKLDANK
AcHv3  DMEIAHKLHYASVAVVSILLIEVTMKIICAGSHFLKRRKIEVFDIIVVASVIVDLIFIKGLNQFPVDDSI FVLAFLLELVIVVNSLVMVAVIDHEHV
      : * * : : * : : : * : : * : : * : : * : : * : : * : : * : : * : : * : : * : : * : : * : : * : : * : : * : : * : :

```

C-terminal domain  
(no significant homology)

Direct alignment of the four transmembrane domains (S1-S4) including the cytosolic linkers. The extracellular S1-S2 loops show no significant homology. All three channels have an aspartate (selectivity filter) in the middle of S1.

Fig S4:

***Aplysia* H<sub>v</sub> channels: Loop and domain length**

| Type                    | total length | NTD | <b>S1-S2</b> | S2-S3 | S3-S4 | <b>CTD</b> |
|-------------------------|--------------|-----|--------------|-------|-------|------------|
|                         |              | int | <b>ext</b>   | int   | ext   | <b>int</b> |
| <b>ACh<sub>v</sub>1</b> | 281          | 53  | <b>14</b>    | 17    | 8     | <b>114</b> |
| <b>ACh<sub>v</sub>2</b> | 339          | 73  | <b>79</b>    | 17    | 11    | <b>82</b>  |
| <b>ACh<sub>v</sub>3</b> | 980          | 35  | <b>299</b>   | 3     | 8     | <b>534</b> |
| hH <sub>v</sub> 1       | 273          | 100 | <b>12</b>    | 17    | 8     | <b>55</b>  |
| NpH <sub>v</sub> 1      | 239          | 54  | <b>10</b>    | 17    | 8     | <b>69</b>  |
| KvH <sub>v</sub> 1      | 248          | 39  | <b>41</b>    | 17    | 8     | <b>65</b>  |

Number of amino acids in different regions of the ACh<sub>v</sub>1-2 channels and H<sub>v</sub>s of three additional species. NTD: N-terminal domain, CTD: C-terminal domain, loops between the four transmembrane regions are indicated. hH<sub>v</sub>1: human; NpH<sub>v</sub>1: *Nicoletia phytophila*; KvH<sub>v</sub>1: *Karlodinium veneficum*.

Fig S5:

RT-PCR quantification of AcHv1, AcHv2, and AcHv3, in *Aplyisa californica* tissue samples

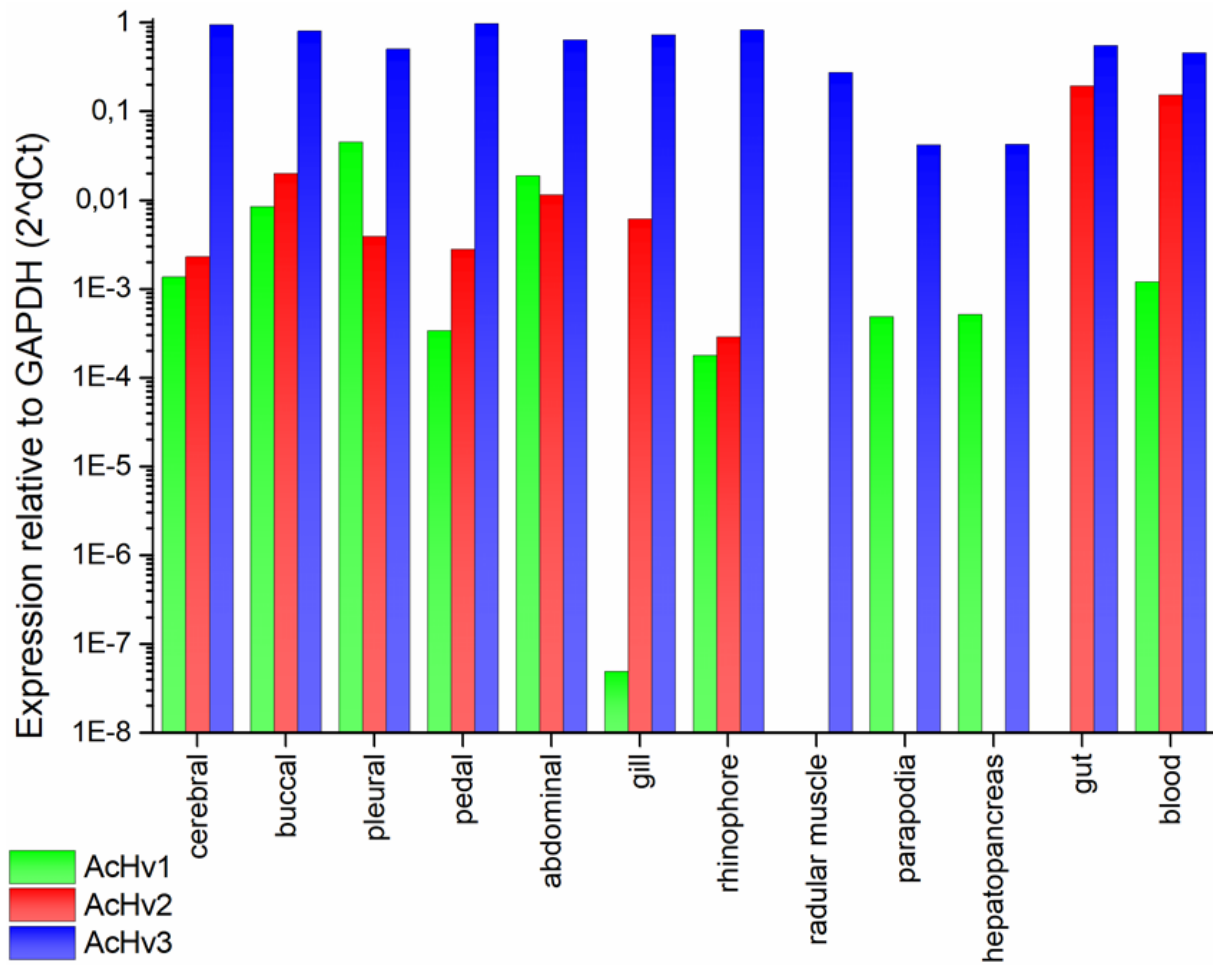

AcHv1, 2, 3 RT-PCR quantification relative to GAPDH in 12 different tissues of 4 animals with up to 5 individual measurements. Numbers are given in  $2^{-\Delta Ct}$ , where 1 would be equal to the expression of GAPDH.

Fig S6:

Expression of ACh<sub>v</sub>1, ACh<sub>v</sub>2, and ACh<sub>v</sub>3 in comparison to GAPDH

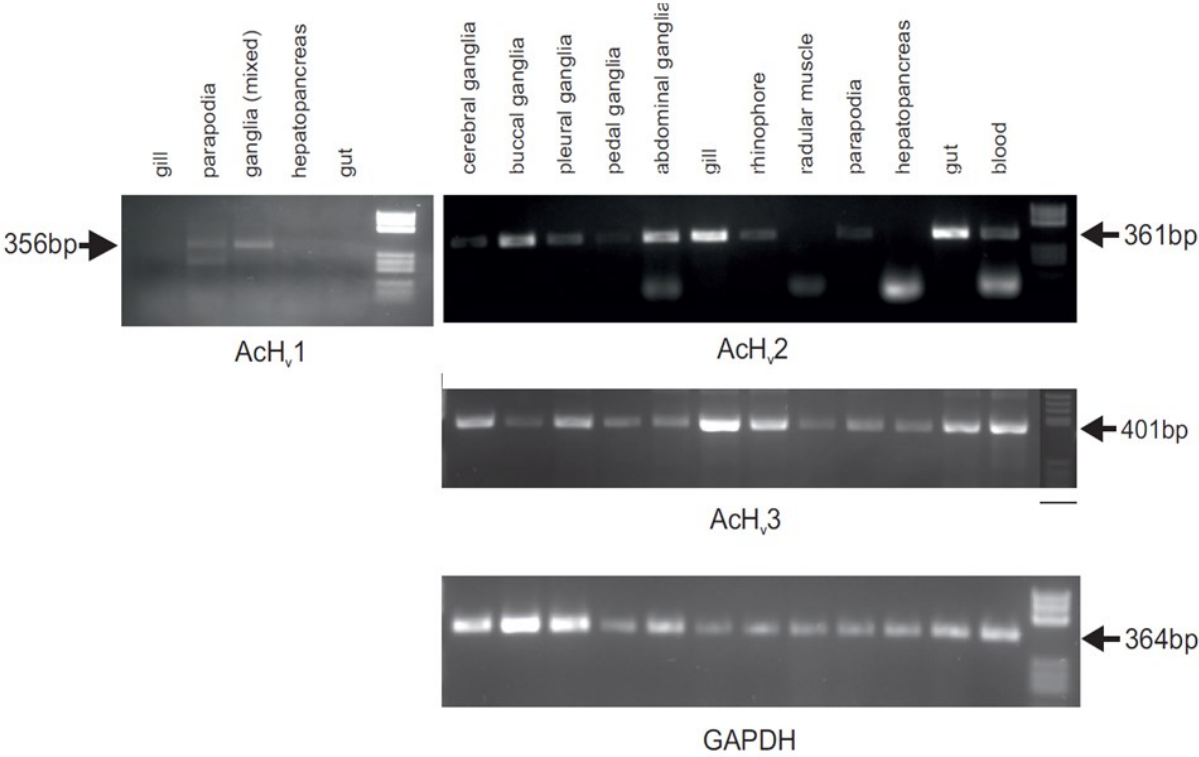

Independent mRNA analysis of the expression of ACh<sub>v</sub>1, ACh<sub>v</sub>2, ACh<sub>v</sub>3, and GAPDH from 3 animals. Data is in good agreement with the RT-PCR data from Fig. S5.

Fig. S7:

Expression of AcHv1, AcHv2 and AcHv3 dependent on animal age:

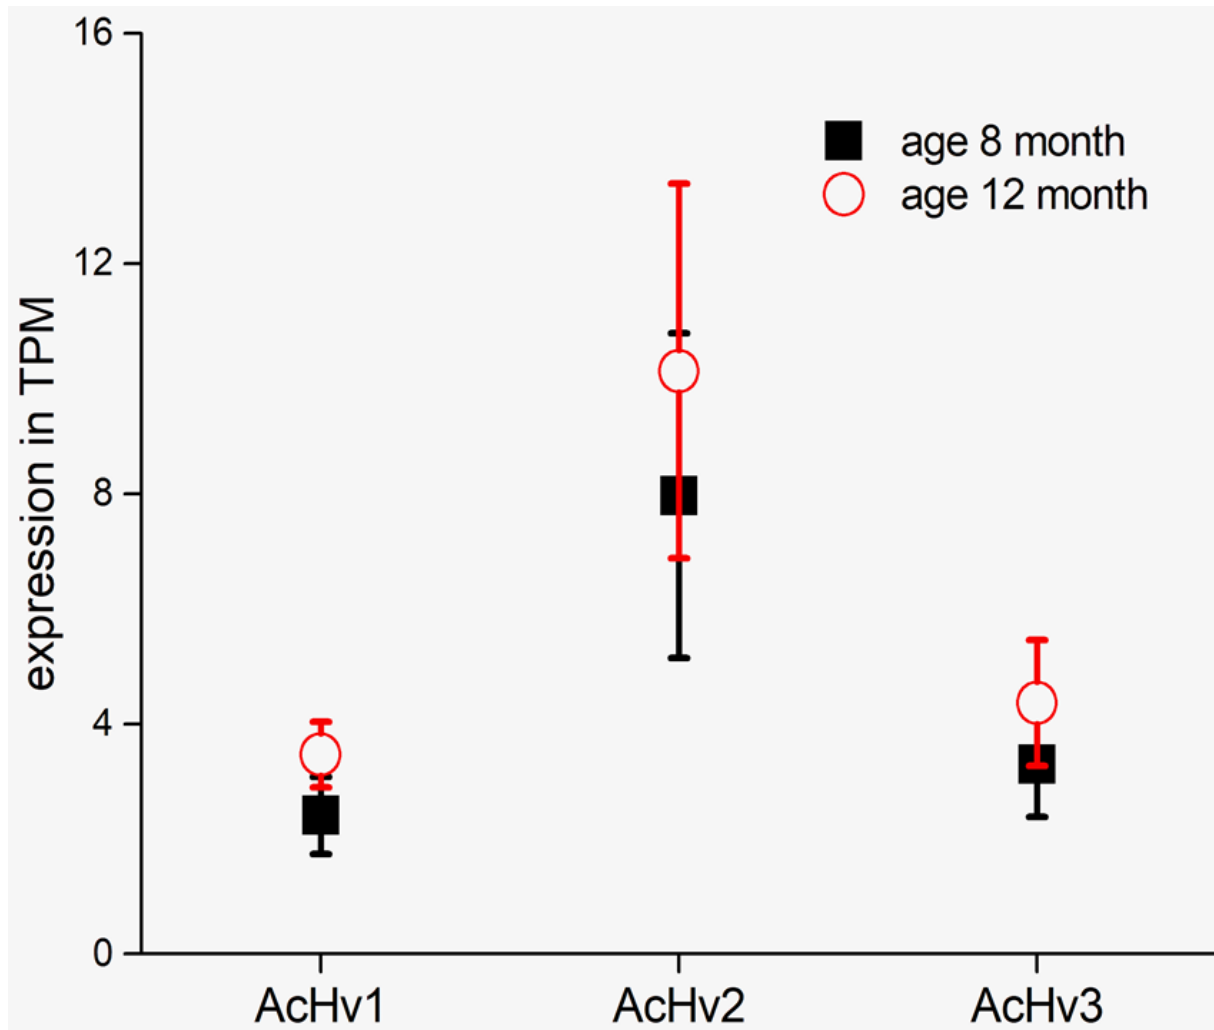

Expression in Transcripts Per Million (TPM) in pleural ganglion sensory neurons obtained from 6 sexually mature animals at age 8 months (black squares) and at age 12 months (red circles), data depicted in mean and S.E.M. AcHv2 appears to be upregulated by age ( $p = 0.0618$ ); AcHv1 and AcHv3 are not obviously affected by aging (AcHv1  $p = 0.2555$ , AcHv3  $p = 0.4710$  students t-test)

Fig. S8:

Tail current amplitude analysis of ACh<sub>v</sub>3

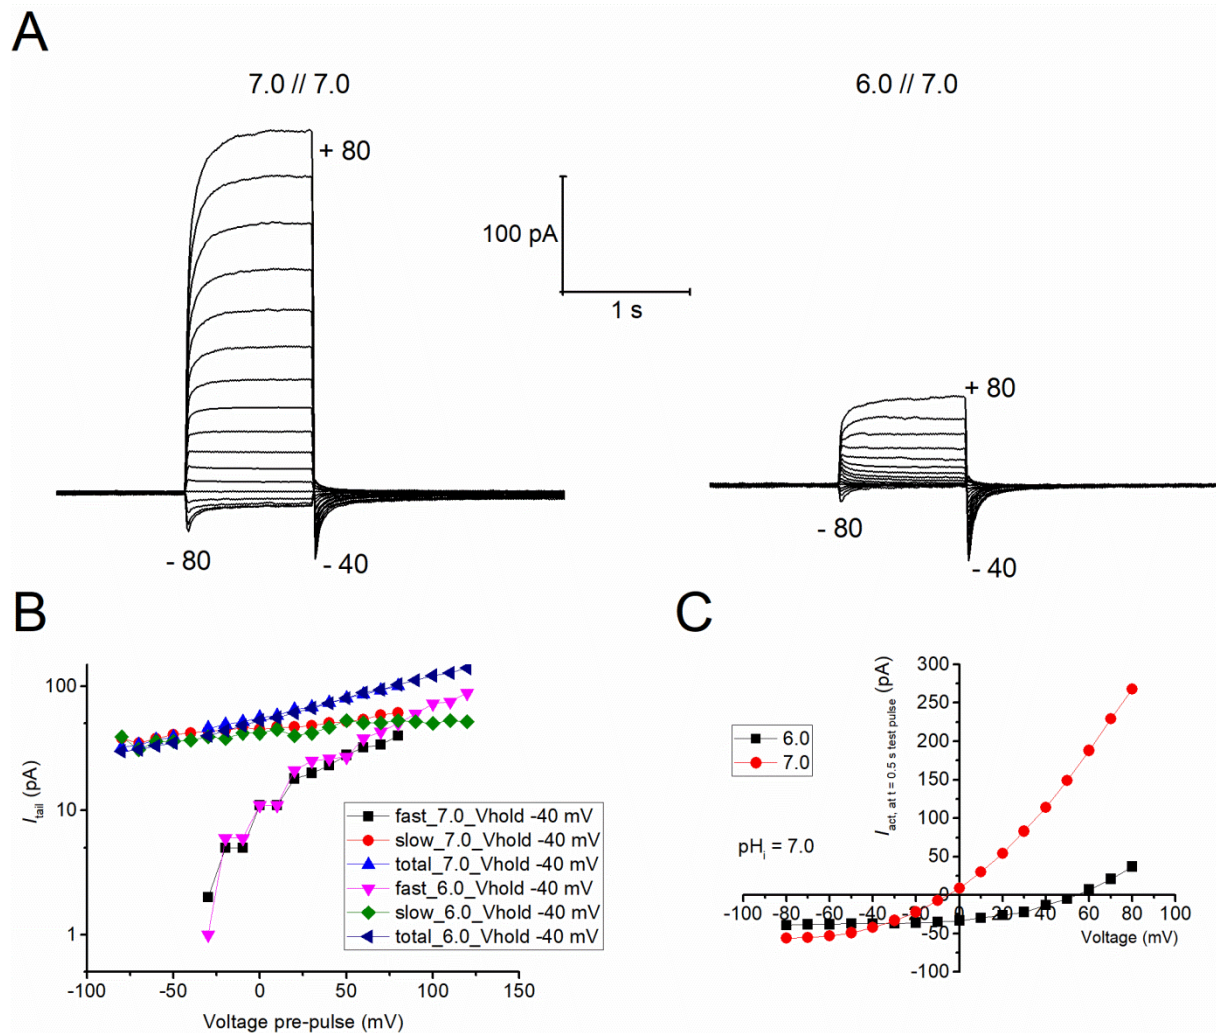

**A)** Two current families with pulses from -80 mV to + 80 mV in 10 mV increments and a holding potential of -40 mV at pH<sub>o</sub> 7.0 or 6.0 and pH<sub>i</sub> 7.0.

**B)** Tail current amplitude in pA at both pH<sub>o</sub> 7.0 and 6.0. Tail currents showed a fast and a slow component. The slow component amplitude was calculated from the intersection of the extrapolated current to the starting time point of repolarisation to holding potential. The fast component was directly measured at the identical time point. Total current is the sum of slow and fast components. The currents are affected by pH<sub>o</sub>. However, the reversal potential was -8 mV at pH<sub>o</sub> 7.0 and +55 mV at pH<sub>o</sub> 6.0. **C)** Current voltage plot, current 0.5 s after the pulse was plotted at each voltage. Reversal potential can be estimated from the individual curves.

Fig S9:

HH model of  $\text{AChV}_3$  currents

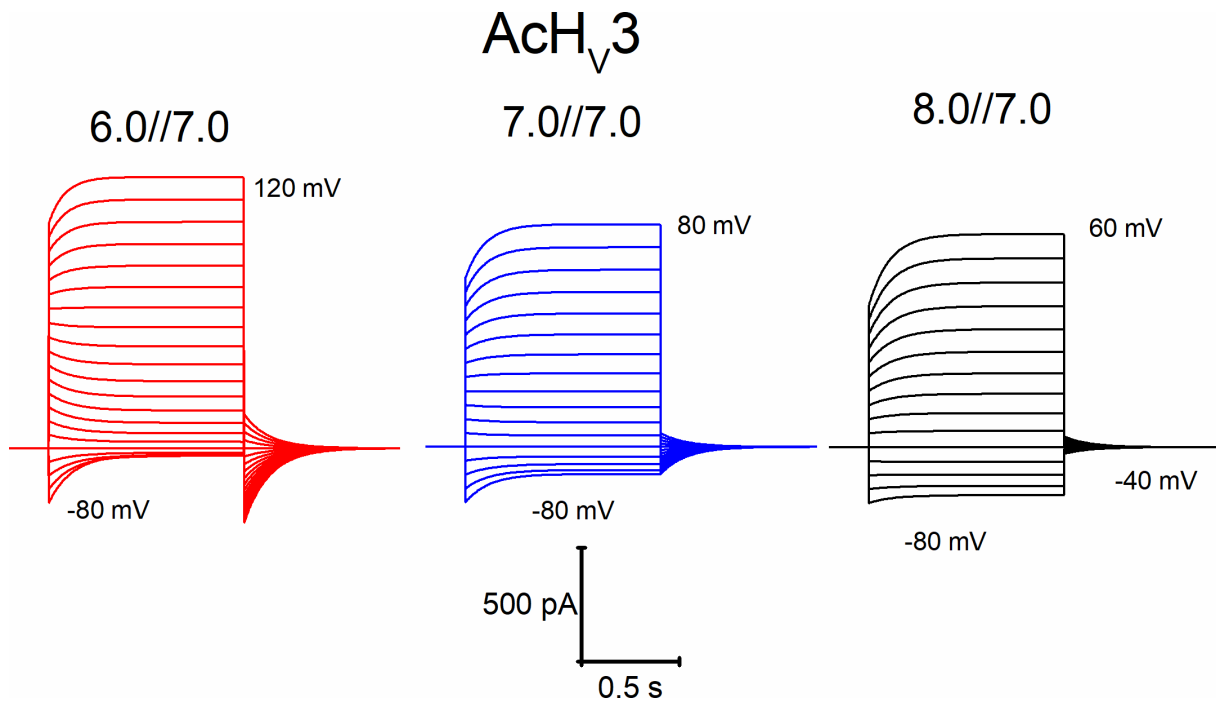

Currents from the simple two states model. Note that there is no pH-dependence of gating or pH-dependence of conductance implemented. Overall the shape of the currents is presented in accordance with figure 4. Holding potential is -40 mV at all  $\text{pH}_o$ .



Fig. S10:

## **EST-coverage of predicted coding region:**

**AcHv1:** 76.9 % (100 % exon-intron boundaries within coding sequence)

FC764689      3-219

**AcHv2:** 100% (100% exon-intron boundaries within coding sequence)

EB327294      1-186

EB299171      122-270

FC764689      168-304

EB210826      290-339

**AcHv3:** 62.0 % (100% exon-intron boundaries within coding sequence)

EB337456      1-64

EB295811      96-323

HS121401      338-520

EB313783      797-929

EST-coverage of the predicted coding region of the three *Aplysia californica* paralogs. Of all three channels the whole exon-intron boundaries are covered by the EST sequences. Therefore, all exons are included. Not EST covered parts of the genomic DNA was verified by mollusk genome sequences other than *Aplysia californica*. A detailed analysis mollusk H<sub>v</sub> channels will be presented in a upcoming publication.

Fig. S11:

*Aplysia californica* voltage-gated hydrogen channel 1-like  
(LOC101848758) **AcH<sub>v</sub>1**

XM\_005100609

TSA: GBBG01064906 GBDA01021710 GBCZ01104187

MKLDGLRKMQDDLVKVIERDDTSTVTSDSDETIARGPKTLRETLDVVIHS  
QKFMVFIIVLVVLDCLMVIAELLFDLEIVKLGEHHYIPKIFHYGSLGII  
SLFLIEIGLRIFVLRDLDFKHKLELFDVAVVIVSFILDIVFRDNE DAATG  
VGLLIILRLRVTRIVNGIVLSVQKQAEKKIEREKHLREECEQELAKFRE  
YCMAQAEAEIEVLQGLLHKHNIEFTTNKITRPE SRVQVDVVAEVNSMTAVA  
ETDIPLSPSQPGEQEISLSSGDNVTDVAVVVV-

*Aplysia californica* uncharacterized LOC101850633\_X1-X4

XM\_005093050 **AcH<sub>v</sub>2**

TSA: GBBE01033180

MRMSRSIEYPSEKNGEPSCIEAEQRSGETKMLKSEQSQDEAETSDWSENE  
DSHSGKLDANSCKGKLA AFLKTNLVQYSIIALVILDCLIIVMELLI DMNI  
IVFPEDDPHPPGEGSSHPVAFASRSSNLTGDNHTVYPAHHIHTHHNS  
SNLTMYGND SAHAAPVHHHTNKEKAEHVLHALSLTILSIFMVEVCVKIYV  
EGKHM LKQKAEVFD AIVVIVSFTLDITFSFVSVSKAASEAAGLMVILRLV  
RVTRIIINGVIMSVKLDANKKMEVHKKARRKLERENKRLQAKIERLEREVA  
TLKQKMATSSSTPQMSFEMQSGLSVERSPSGEMRENSAQV-

*Aplysia californica* uncharacterized LOC101855857

XM\_005094218 **AcH<sub>v</sub>3**

TSA: GBAV01052985

MGDAEPRAHPRPRGQASPFMPRLRKRGEKLLHSKYVWILVIILTVD CAL  
VIAELI L DLSSVKKTQGATEAMLSFVEKIIKKYPDEVAPLHSLTDVFEE  
LNHADIVWNNTRNSRGHDLDPDLERNLHHHHKNRDALHTSVTTPTSVPV  
VGGESVAEGWPLSSDTP LGVGNFSRALRTLWIQKRNYSSNSRFRRSNRND  
SLRDSSAVLSRLLERTRLEIEKVL SKLSRRRKRSSSEETGGLTAEYEATDS  
GEAGDTSRNSQELEDEVLNSDFFENNYGKNGKTYLSSLTGLIVKILTMQ  
SNETGPILGGPARYAEAPLTVESAGKGEKGAHVSDQDILHKYRLEFHH  
SEDMEIAHKLHYASVAVVSILLIEVTMKIICAGSHFLKRKIEVFD AIVV  
ASVIVDLIFIKGLNQFPVDDSI FVLAFLLPKRVIVVNSLVM AVIDHEHV  
KLRLLYSRKKKLDKTVETLRNEVDELKGMQDIRQFCIKEGIEASRIDSL  
LGKFAPRRR KDSKFYTLV KLV M STASINNNNDNDNSVSSSSMENDLRDYA  
NRDSVLNEATSNENTVTLKQYLSVPFFSGGNRSNTLDIESRGSGRSGGS  
PSIYITSPASDDEAPVFSFDIAEDDDVMSNDQDDAGSQDDETSIQAGSD  
AATI AVTSAE VNTVSPNVAFYVGSQSSLC SVHSQEDIRTWDTNDNYERN  
FPMCGVPCASGGEDLAAAALDDVISNSPTVNSNSWGSPSRHYSRFLTVPCC  
TLLSAVTNTTSTATSY P SSSNNTNNNSNSNNNNNACAETHPLLGDPPP  
GQNMTRSVSDNCDVTATQYGARTCGGRYGSFVPMRRKPC LSEKRRSYARA  
RSESIENQEFIP LMSQ GANKGRVRHHS DLEGRPSTRKDDLKRSRSHSPSP  
MVLLGVP GQTKKYS D P P P S Y Q A A S R S M N D V S S A G K G S G N P H A N N L G K D G  
RILRRSCLSLTSEGRKRRGKSPQRVSFKVS-

Amino acid sequence Maximum Likelihood method (implemented in Bio-Edit), version 3.6a2.1

Jones-Taylor-Thornton model of amino acid change

Fig. S12:

**List of *Aplysia californica* H<sub>v</sub> channels.** GenBank and TSA accession numbers are shown. Transmembrane regions (yellow), selectivity filter (magenta), and voltage-sensor motif (R blue, W red) are indicated.

### Identity/Homology within the core region (S1-S4) (in %)

|                               |           |              | AcHv1 | AcHv2 | AcHv3 |
|-------------------------------|-----------|--------------|-------|-------|-------|
| <i>Extatosoma tiaratum</i>    | Insecta   | GAWG01024136 | 39/59 | 35/60 | 28/51 |
| <i>Nicoletia phytophila</i>   | Insecta   | KT780722     | 46/70 | 41/61 | 38/57 |
| <i>Homo sapiens</i>           | Mammalia  | NM_001040107 | 45/66 | 40/60 | 33/56 |
| <i>Mus musculus</i>           | Mammalia  | NM_001042489 | 43/59 | 42/59 | 33/52 |
| <i>Karlodinium veneficum</i>  | Alveolata | JN255155     | 27/41 | 27/42 | 26/46 |
| <i>Lingulodinium polyedra</i> | Alveolata | KU752798     | 35/56 | 27/45 | 24/44 |
| <i>Emiliana huxley</i>        | Haptista  | XP_005762299 | 28/42 | 28/47 | 24/38 |

### Preliminary cladogram of ten different H<sub>v</sub> channels

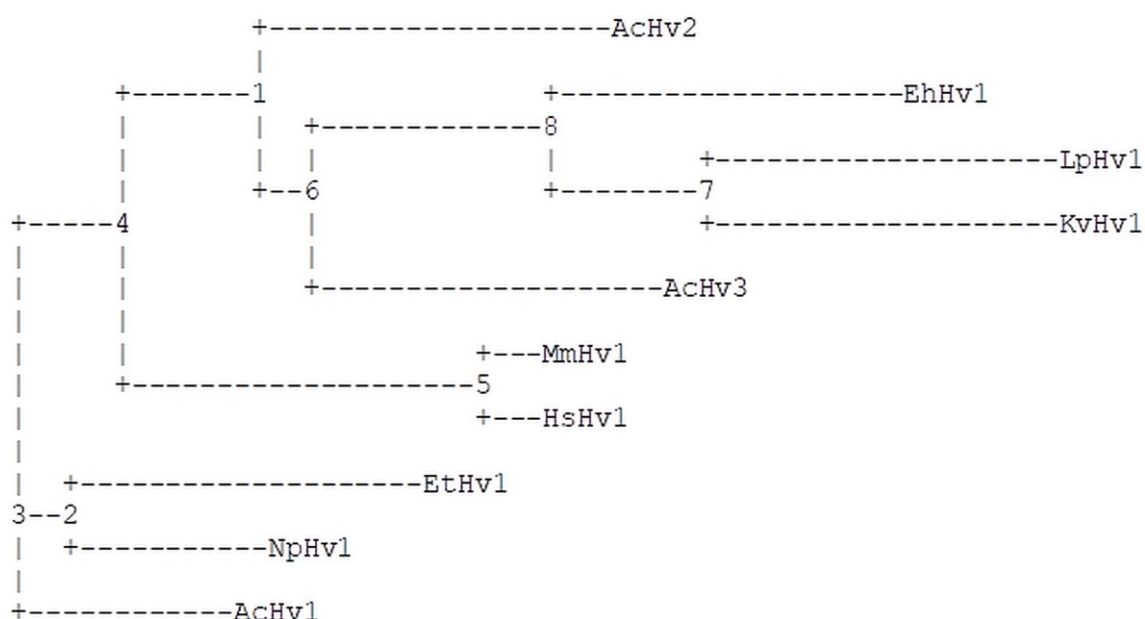

Supplement: NIHMS1967608-supplement-SI_for_Chaves_etal_2023.pdf [file NIHMS1967608-supplement-SI_for_Chaves_etal_2023.pdf]
